# Supplementary material for: Rehabilitation Interventions for Physical Capacity and Quality of Life in Adults With Post–COVID-19 Condition: A Systematic Review and Meta-Analysis
Source: PubMed Central journal article supplement (PMC10509723; doi:10.1001/jamanetworkopen.2023.33838), 2023-09-19
Supplement: jamanetwopen-e2333838-s002.pdf [file jamanetwopen-e2333838-s002.pdf]

## Data Sharing Statement

Pouliopoulou. Rehabilitation Interventions for Physical Capacity and Quality of Life in Adults With Post–COVID-19 Condition. *JAMA Netw Open*. Published September 19, 2023.

doi:10.1001/jamanetworkopen.2023.33838

### Data

**Data available:** Yes

**Data types:** Data (not involving human participants)

**How to access data:** The guarantor (DVP) is willing to examine all requests for the full dataset after two years from the date of this publication.

**When available:** beginning date: 06-01-2025

### Supporting Documents

**Document types:** None

### Additional Information

**Who can access the data:** researchers whose proposed use of the data has been approved

**Types of analyses:** for any purpose

**Mechanisms of data availability:** after approval of a proposal
